# Supplementary material
Source: PubMed Central journal article supplement (PMC555518)

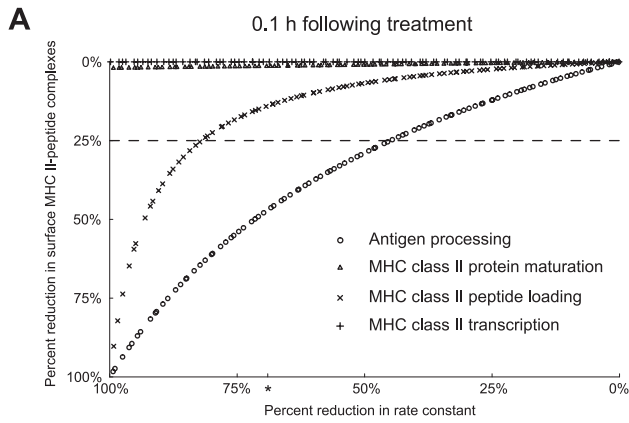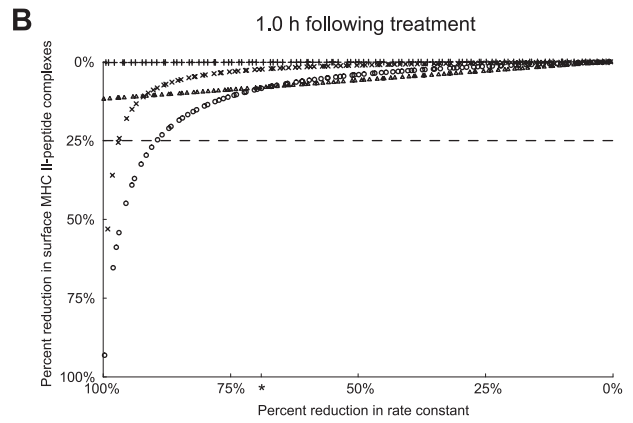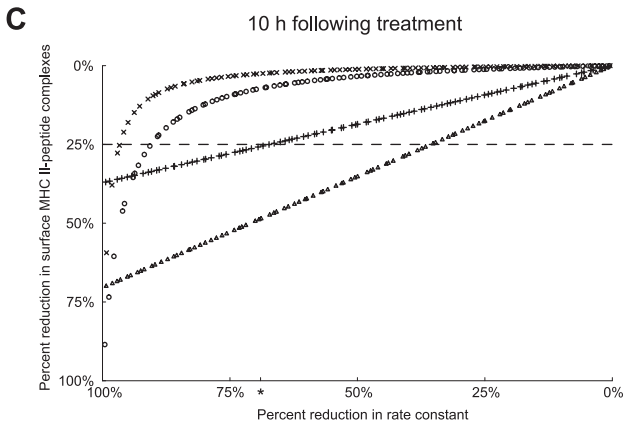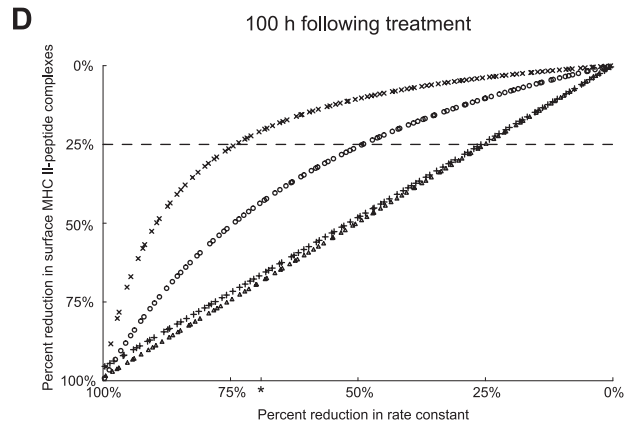

Supplement: pnas_102_12_4530__2.pdf [file pnas_102_12_4530__2.pdf]
